# Supplementary material for: Structure and mechanism of hydrolysis of diaryl(acylamino)(chloro)-λ4-sulfanes and diaryl(acylamino)sulfonium salts†
Source: Royal Society of Chemistry journal article supplement (doi:10.1039/b008156f), 2001-01-01
Supplement: b008156f.doc [file b008156f.doc]

**Supplementary data**

**Structure and mechanism of hydrolysis of diaryl(acylamino)-(chloro)-4-sulfanes and diaryl(acylamino)sulfonium salts**

**Péter Nagy,a Antal Csámpai,b Dénes Szabó,a Jenő Varga,a Veronika Harmat,c**

**Ferenc Ruffa*and Árpád Kucsmana**

*aDepartment of Organic Chemistry, bDepartment of General and Inorganic Chemistry, cDepartment of Theoretical Chemistry, L. Eötvös University,PO Box 32, H-1518, Budapest 112.*

*Phone: +36 1 2090555, Fax: 36 1 3722 620; E-mail: szabod@szerves.chem.elte.hu*

**Table 11**. 1H-NMR data of the compounds obtained by chlorination of sulfides **1a** **-l** measured in CDCl3.

| Comp. | H-3  *d*a | H-4  *t*a | H-5  *t*a | H-6  *d*a | H-2’  *d*a | H-3’  *d*a,b or *t*a,b | H-4’  *t*a | H-5’  *t*a | H-6’  *d*a | NMe  *s* | X or Y |
| --- | --- | --- | --- | --- | --- | --- | --- | --- | --- | --- | --- |
| **2a** | 8.28 | 8.02 | 8.04 | 9.66 | 7.77 | 7.58 | 7.69 | 7.58 | 7.77 | 3.27 | - |
| **2b** | 8.13 | 7.92c | 7.92c | 9.56 | - | 7.06 | 7.56 | 6.96 | 7.12 | 3.23 | 3.92 *s* (2’-OMe) |
| **2c** | 8.16 | 7.95c | 7.95c | 9.71 | - | 7.34 | 7.45 | 7.12 | 6.39 | 3.16 | 3.11 *s* (2’-Me) |
| **2d** | 8.15 | 7.94c | 7.94c | 9.68 | - | 7.62 | 7.44 | 7.23 | 6.47 | 3.17 | - |
| **2e** | 8.18 | 7.94c | 7.94c | 9.63 | - | 8.68 | 7.63 | 7.88 | 6.69 | 3.18 | - |
| **2j** | 8.20 | 7.98 | 7.93 | 9.43 | 7.72 | 7.01 | - | 7.01 | 7.72 | 3.25 | 3.87 *s* (4’-OMe) |
| **2k** | 8.20 | 7.98 | 7.94 | 9.52 | 7.68 | 7.25 | - | 7.25 | 7.68 | 3.26 | 2.41 *s* (4’-Me) |
| **2l** | 8.21 | 7.98 | 7.94 | 9.49 | 7.71 | 7.38 | - | 7.38 | 7.71 | 3.29 | - |
| **3f** | 8.18 | 7.92 | 7.89 | 9.06 | - | 8.09 | 7.64 | 7.54 | 6.78 | 3.50 | 4.17 *s* (2’-CO2Me) |
| **3g** | 8.29 | 7.96 | 7.92 | 8.43 | - | 9.60 | 8.00 | 7.80 | 7.34 | 3.52 | 3.30 *d*d and 12.08 br *s*d |
| **3h** | 8.19 | 7.89 | 7.84 | 8.74 | - | 8.06 | 7.72 | 7.61 | 6.97 | 3.63 | 2.99 *s* (2’-COMe) |
| **4a** | 8.17 | 7.97 | 7.92 | 8.19 | 7.71 | 7.61 | 7.77 | 7.61 | 7.71 | 3.33 | - |
| **4b** | 8.23 | 8.01c | 8.01c | 8.33 | - | 7.17 | 7.83 | 7.23 | 7.75 | 3.41 | 3.79 *s* (2’-OMe) |
| **14** | 8.03 | 7.69 | 7.63 | 8.39 | - | 8.18 | 7.66 | 7.58 | 7.22 | 3.29 | - |
| **15** | 8.20 | 7.73 | 7.61 | 7.52 | - | 8.20 | 7.73 | 7.61 | 7.52 | 3.15 | 3.15 *s* (2’-CONMe) |

a J = 8.0 ± 0.6 Hz. b *d* for **2b-e**,**j-l**, **3f-h**, **4b**, **14** and **15**, *t* for **2a** and **4a**. c Overlapping signals (2H): M part of an AMM’X spin system.  d Me (*d*, J = 3.3 Hz) and NH (broad *s*) signals of the 2’-CONHMe group..

**Table 12**. 1H-NMR data of the compound obtained by chlorination of sulfide **6** measured in CDCl3

| Comp. | H-3  *d*a | H-4  *t*a | H-5  *t*a | H-6  *d*a | H-2’  *d*a | H-3’  *t*a | H-4’  *d*a | H-5’  *d*a | H-6’  *t*a | H-7’  *d*a | NMe  *s* | CO2Me  *s* |
| --- | --- | --- | --- | --- | --- | --- | --- | --- | --- | --- | --- | --- |
| **7** | 8.17 | 7.84 | 7.80 | 8.74 | 7.10 | 7.48 | 8.10 | 8.10 | 7.62 | 8.48 | 3.32 | 4.13 |

a J = 7.7 ± 0.1 Hz.

**Table 13**. 1H-NMR data of the compounds obtained by chlorination of sulfides **9a,f** measured in CDCl3

| Comp. | H-2  *d*a | H-3  *t*a | H-4  *d*a | H-5  *d*a | H-6  *t*a | H-7  *d*a | H-2’  *d*a | H-3’  *d*a,b or *t*a,b | H-4’  *t*a | H-5’  *t*a | H-6’  *d*a | NMe  *s* | CO2Me  *s* |
| --- | --- | --- | --- | --- | --- | --- | --- | --- | --- | --- | --- | --- | --- |
| **10a** | 9.91 | 7.90 | 8.41 | 8.45 | 7.93 | 8.77 | 7.96 | 7.53 | 7.64 | 7.53 | 7.98 | 3.74 | - |
| **11f** | 9.23 | 7.86 | 8.45 | 8.40 | 7.80 | 8.78 | - | 8.20 | 7.91 | 7.60 | 7.41 | 3.82 | 4.17 |

a J = 7.4 ± 0.2 Hz. b *d* for **11f** and *t* for **10a**

**Table 14. 13C-NMR data of the compounds obtained by chlorination of sulfides 1a -l measured in CDCl3a**

| Comp. | C-1 | C-2 | C-3 | C-4 | C-5 | C-6 | C-1’ | C-2’ | C-3’ | C-4’ | C-5’ | C-6’ | CO lactam | NMe |
| --- | --- | --- | --- | --- | --- | --- | --- | --- | --- | --- | --- | --- | --- | --- |
| **2a** | 133.0 | 129.3 | 127.4 | 136.1 | 135.0 | 132.2 | 134.0 | 129.8 | 131.1 | 134.7 | 131.1 | 129.8 | 164.3 | 28.4 |
| **2b** | 136.3 | 130.9 | 127.3 | 134.8 | 135.6 | 132.8 | 130.3 | 159.2 | 114.3 | 137.2 | 123.3 | 130.0 | 164.7 | 29.1 |
| **2c** | 131.0 | 130.7 | 127.6 | 135.1 | 136.0 | 133.6 | 133.1b | 141.8 | 133.1b | 134.6 | 129.3 | 125.0 | 163.7 | 28.3 |
| **2d** | 135.7 | 130.2 | 127.8 | 135.6 | 136.4 | 133.4 | 135.0 | 131.6 | 132.8 | 135.9 | 130.5 | 126.5 | 164.1 | 28.3 |
| **2e** | 132.6 | 129.4 | 127.8 | 135.3 | 136.9 | 133.2 | 137.4 | 150.2 | 128.0 | 138.1 | 139.4 | 128.5 | 164.1 | 29.0 |
| **2j** | 131.9 | 128.5 | 127.3 | 136.1 | 134.9 | 131.2 | 133.9 | 133.3 | 116.8 | 165.3 | 116.8 | 133.3 | 164.3 | 28.0 |
| **2k** | 132.3 | 128.6 | 127.5 | 136.6 | 135.3 | 131.4 | 134.6 | 129.6 | 127.1 | 145.2 | 127.1 | 129.6 | 164.4 | 28.2 |
| **2l** | 133.0 | 128.3 | 127.8 | 135.5 | 136.1 | 132.2 | 135.1 | 132.5 | 131.4 | 140.3 | 131.4 | 132.5 | 154.5 | 28.6 |
| **3f** | 135.3 | 128.4 | 128.0 | 134.5 | 136.3 | 129.1 | 137.3 | 138.6 | 132.6 | 135.4 | 134.8 | 123.7 | 165.5 | 30.9 |
| **3g** | 135.2 | 128.3 | 128.5 | 134.7b | 136.3 | 128.7 | 137.0 | 137.9 | 132.6 | 135.6 | 134.7b | 123.5 | 165.9 | 30.0 |
| **3h** | 135.3 | 128.3 | 128.1 | 134.7b | 136.1 | 129.4 | 135.6 | 140.2 | 130.7 | 134.1 | 134.7b | 124.6 | 166.1 | 31.0 |
| **4a** | 134.6 | 128.4 | 127.9 | 135.8 | 135.0 | 129.1 | 130.0 | 130.9 | 131.9 | 136.5 | 131.9 | 130.9 | 164.2 | 29.2 |
| **4b** | 131.0 | 128.0 | 127.9 | 136.8 | 135.3 | 128.1 | 111.4 | 161.1 | 114.6 | 140.5 | 123.7 | 134.2 | 165.1 | 29.6 |
| **14** | 137.8 | 130.3 | 127.7 | 134.0 | 135.2 | 130.0 | 135.5 | 135.7 | 131.0 | 134.2 | 133.7 | 124.3 | 166.0 | 28.9 |
| **15** | 135.9 | 135.4 | 127.5 | 133.2b | 133.2b | 127.3 | 135.9 | 135.4 | 127.5 | 133.2b | 133.2b | 127.3 | 164.4 | 27.1 |

a Signals of X and Y: **2b** 57.9 (2’-OMe); **2c** 21.1 (2’-Me); **2j** 56.4 (4’-OMe); **2k** 20.3 (4’-Me); **3f** 54.3 (2’-CO2Me); 168.0 (2’-CO2Me); **3g** 28.7 (2’-CONHMe); 166.3 (2’-CONHMe); **3h** 27.3 (2’-COMe); 201.8 (2’-COMe); **4b** 57.7 (2’-OMe);

**Table 15**. 13C-NMR data of the compound obtained by chlorination of sulfide **6** measured in CDCl3

| Comp. | C-1  C-2 | C-3  C-4 | C-5  C-6 | C-1’  C-2’ | C-3’  C-4’ | C-4a’  C-8a’ | C-5’  C-6’ | C-7’  C-8’ | NMe  OMe | CO (lactam)  CO (ester) |
| --- | --- | --- | --- | --- | --- | --- | --- | --- | --- | --- |
| **7** | 137.6  128.2 | 128.1  134.5 | 136.0  129.3 | 135.7  129.4 | 126.8  136.8 | 127.8  130.6 | 136.1  127.5 | 133.8  126.1 | 30.0  54.8 | 165.8  171.6 |

.

**Table 16**. 13C-NMR data of the compounds obtained by chlorination of sulfides **9a,f** measured in CDCl3

| Comp. | C-1  C-2 | C-3  C-4 | C-4a  C-8a | C-5  C-6 | C-7  C-8 | C-1’  C-2’ | C-3’  C-4’ | C-5’  C-6’ | NMe  OMe | CO (lactam)  CO (ester) |
| --- | --- | --- | --- | --- | --- | --- | --- | --- | --- | --- |
| **10a** | 133.4  135.2 | 128.3  135.9 | 116.3  127.4 | 136.6  128.6 | 133.5  120.4 | 133.6  128.9 | 131.5  135.4 | 131.5  128.9 | 37.4  - | 162.2  - |
| **11f** | 133.4  134.0 | 127.6  135.8 | 117.9  126.7 | 136.9  129.2 | 133.2  119.6 | 135.3  130.0 | 133.9  136.1 | 136.6  127.2 | 37.7  54.7 | 162.8  166.8 |

**Table 17**. 1H-NMR data of the compounds obtained by chlorination of sulfides **1a** **-q** measured in DMSO-d6.

| Comp. | H-3  *d*a | H-4  *t*a | H-5  *t*a | H-6  *d*a | H-2’  *d*a | H-3’  *d*a,b or *t*a,b | H-4’  *t*a | H-5’  *t*a | H-6’  *d*a | NMe  *s* | X or Y |
| --- | --- | --- | --- | --- | --- | --- | --- | --- | --- | --- | --- |
| **2a** | 8.23 | 8.09 | 8.11 | 9.07 | 7.75 | 7.61 | 7.71 | 7.61 | 7.75 | 3.20 | - |
| **2b** | 8.21 | 8.08 | 8.12 | 8.87 | - | 7.07 | 7.73 | 7.09 | 7.39 | 3.24 | 3.92 *s* (2’-OMe) |
| **2c** | 8.25 | 8.12 | 8.15 | 9.13 | - | 7.58 | 7.63 | 7.30 | 6.63 | 3.18 | 3.00 *s* (2’-Me) |
| **2d** | 8.21 | 8.11 | 8.15 | 9.21 | - | 7.81 | 7.67 | 7.39 | 6.70 | 3.24 | - |
| **2j** | 8.19 | 8.06 | 8.03 | 8.86 | 7.70 | 7.14 | - | 7.14 | 7.70 | 3.18 | 3.83 *s* (4’-OMe) |
| **2k** | 8.22 | 8.06 | 8.09 | 8.92 | 7.57 | 7.23 | - | 7.23 | 7.57 | 3.20 | 2.31 *s* (4’-Me) |
| **2l** | 8.20 | 8.05 | 8.09 | 9.08 | 7.75 | 7.66 | - | 7.66 | 7.75 | 3.19 | - |
| **2m** | 8.25 | 8.12 | 8.15 | 9.22 | 7.99 | 8.35 | - | 8.35 | 7.99 | 3.22 | - |
| **2n** | 8.25 | 8.11 | 8.14 | 9.02 | 7.87 | 8.11 | - | 8.11 | 7.87 | 3.22 | 3.88 *s* (4’-CO2Me) |
| **2o** | 8.25 | 8.12 | 8.16 | 9.15 | 7.89 | 8.12 | - | 8.12 | 7.89 | 3.21 | 2.72 *d*c (3H) 8.47 *qa*c (1H) |
| **2p** | 8.18 | 8.07 | 8.05 | 9.05 | 7.80 | 8.02 | - | 8.02 | 7.80 | 3.16 | 2.55 *s* (4’-COMe) |
| **2q** | 8.26 | 8.11 | 8.14 | 9.01 | 7.85 | 8.09 | - | 8.09 | 7.85 |  | d |
| **3e** | 8.27 | 8.07 | 8.05 | 8.64 | - | 8.48 | 7.97 | 7.89 | 7.44 | 3.40 | - |
| **3f** | 8.25e | 8.03 | 7.98 | 8.41 | - | 8.25e | 7.90 | 7.86 | 7.56 | 3.42 | 4.19 *s* (2’-CO2Me) |
| **3g** | 8.19 | 7.95 | 7.92 | 8.28 | - | 8.55 | 7.89 | 7.81 | 7.63 | 3.37 | 3.07 *d*c (3H) 10.50 *qa*c (1H) |
| **3h** | 8.20 | 7.96 | 7.93 | 8.12 | - | 8.50 | 7.91 | 7.87 | 7.65 | 3.35 | 2.95 *s* (2’-COMe) |
| **4a** | 8.29 | 8.11f | 8.11f | 8.41 | 7.80 | 7.88 | 7.83 | 7.88 | 7.80 | 3.29 | - |
| **4b** | 8.31 | 8.13 | 8.10 | 8.46 | - | 7.21 | 7.87 | 7.19 | 7.42 | 3.36 | 3.75 *s* (2’-OMe) |
| **5b.HCl** | 7.65 | 7.56 | 7.67 | 7.89 | - | 7.04 | 7.40 | 6.99 | 7.19 | g | 3.73 *s* (2’-OMe) |
| **14** | 8.07 | 7.88 | 7.85 | 8.29 | - | 8.05 | 7.80 | 7.73 | 7.47 | 3.30 | - |
| **15** | 8.04 | 7.80 | 7.72 | 7.54 | - | 8.04 | 7.80 | 7.72 | 7.54 | 3.03 | 3.03 *s* (2’-CONMe) |

a J = 8.0 ± 0.6 Hz. b *d* for **2b-e**,**j-q**, **3f-h**, **4b, 5b.HCl**, **14** and **15**, *t* for **2a** and **4a**. c J = 4.9 Hz (4’-CONHMe) and J = 4.6 Hz (2’-CONHMe). d Due to fast exchange the signal of 4’-COOH is undetectable. e Overlapping signals (2H). f Overlapping signals (2H): M part of an AMM’X spin system. g NHMe 2.67 *d* ( J = 4.4 Hz), NHMe 8.54 *qa* (J = 4.4 Hz).

**Table 18**. 13C-NMR data of the compound obtained by chlorination of sulfide **6** measured in DMSO-d6

| Comp. | H-3  *d*a | H-4  *t*a | H-5  *t*a | H-6  *d*a | H-2’  *d*a | H-3’  *t*a | H-4’  *d*a | H-5’  *d*a | H-6’  *t*a | H-7’  *d*a | NMe  *s* | CO2Me  *s* |
| --- | --- | --- | --- | --- | --- | --- | --- | --- | --- | --- | --- | --- |
| **7** | 8.31 | 8.07 | 8.04 | 8.51 | 7.74 | 7.70 | 8.48 | 8.53 | 7.90 | 8.61 | 3.07 | 4.13 |

a J = 7.7 ± 0.1 Hz.

**Table 19**. 13C-NMR data of the compounds obtained by chlorination of sulfides **9a,f** measured in DMSO-d6

| Comp. | H-2  *d*a | H-3  *t*a | H-4  *d*a | H-5  *d*a | H-6  *t*a | H-7  *d*a | H-2’  *d*a | H-3’  *d*a,b or *t*a,b | H-4’  *t*a | H-5’  *t*a | H-6’  *d*a | NMe  *s* | CO2Me  *s* |
| --- | --- | --- | --- | --- | --- | --- | --- | --- | --- | --- | --- | --- | --- |
| **10a** | 9.03 | 8.05 | 8.67c | 8.68c | 8.05 | 8.69 | 7.71 | 7.62 | 7.74 | 7.62 | 7.71 | 3.67 | - |
| **11f** | 8.81 | 7.91 | 8.53 | 8.58 | 7.99 | 8.71 | - | 8.18 | 7.82d | 7.82d | 7.62 | 3.57 | 4.09 |

a J = 7.4 ± 0.2 Hz. b *d* for **11f** and *t* for **10a**. c Partly overlapping signals. d Overlapping signals (2H): M part of an AMM’X spin system.

**Table 20. 13C-NMR data of the compounds obtained by chlorination of sulfides 1a -q measured in DMSO-d6a**

| Comp. | C-1 | C-2 | C-3 | C-4 | C-5 | C-6 | C-1’ | C-2’ | C-3’ | C-4’ | C-5’ | C-6’ | CO lactam | NMe |
| --- | --- | --- | --- | --- | --- | --- | --- | --- | --- | --- | --- | --- | --- | --- |
| **2a** | 134.1 | 129.9 | 127.8 | 135.4 | 136.3 | 130.4 | 134.2 | 130.5 | 131.4 | 135.1 | 131.4 | 130.5 | 165.4 | 29.5 |
| **2b** | 132.0 | 130.5 | 127.9 | 135.4 | 136.2 | 130.4 | 120.5 | 159.6 | 115.0 | 137.9 | 123.4 | 130.3 | 165.7 | 30.3 |
| **2c** | 131.6 | 129.8 | 127.0 | 134.6 | 135.5 | 130.2 | 132.8 | 141.4 | 132.2 | 134.2 | 129.0 | 125.9 | 163.9 | 28.4 |
| **2d** | 136.6 | 131.2 | 128.2 | 135.8 | 136.5 | 131.8 | 134.9 | 131.8 | 132.2 | 136.0 | 130.9 | 127.9 | 165.1 | 30.4 |
| **2j** | 134.0 | 128.4 | 127.7 | 135.3 | 136.4 | 129.7 | 120.1 | 134.0 | 117.0 | 164.3 | 117.0 | 134.0 | 164.4 | 29.3 |
| **2k** | 133.7 | 128.5 | 127.5 | 135.5 | 134.4 | 130.5 | 133.5 | 129.3 | 125.4 | 146.8 | 125.4 | 129.3 | 165.9 | 28.6 |
| **2l** | 134.2 | 129.9 | 127.8 | 135.5 | 136.3 | 130.5 | 133.5 | 132.2 | 131.3 | 139.9 | 131.3 | 132.2 | 165.4 | 29.5 |
| **2m** | 133.6 | 130.5 | 128.0 | 136.3 | 135.7 | 131.1 | 143.3 | 131.2 | 126.0 | 150.7 | 126.0 | 131.2 | 165.3 | 29.6 |
| **2n** | 133.1 | 129.0 | 127.3 | 135.5 | 134.6 | 129.8 | 134.2 | 125.7 | 129.9 | 136.8 | 129.9 | 125.7 | 164.5 | 28.7 |
| **2o** | 133.6 | 130.0 | 128.5 | 135.7 | 136.8 | 131.4 | 136.1 | 130.6 | 125.9 | 137.9 | 125.9 | 130.6 | 165.6 | 30.1 |
| **2p** | 139.7 | 126.5 | 128.0 | 135.6 | 136.4 | 130.7 | 141.2 | 130.4 | 130.6 | 129.5 | 130.6 | 130.4 | 165.4 | 29.6 |
| **2q** | 133.8 | 129.8 | 128.4 | 135.5 | 136.5 | 131.6 | 136.4 | 130.6 | 126.6 | 138.8 | 126.6 | 130.6 | 165.5 | 29.0 |
| **3e** | 135.3 | 128.5 | 128.6 | 135.6 | 136.9 | 128.4 | 135.5 | 148.6 | 127.6 | 137.8 | 135.7 | 127.3 | 166.5 | 31.0 |
| **3f** | 137.0 | 127.4 | 128.6 | 135.3 | 137.0 | 127.5 | 135.1 | 131.1 | 132.4 | 134.9 | 136.8 | 126.0 | 167.0 | 31.1 |
| **3g** | 137.4 | 127.0 | 127.3 | 134.0 | 135.7 | 126.8 | 133.2 | 131.6 | 128.7 | 133.4 | 134.6 | 124.6 | 166.1 | 29.5 |
| **3h** | 137.6 | 127.5 | 126.9 | 135.2 | 137.0 | 133.6 | 133.0 | 137.4 | 128.6 | 134.8 | 136.8 | 125.7 | 167.1 | 30.9 |
| **4a** | 134.2 | 128.5 | 128.3 | 135.6 | 137.1 | 128.7 | 130.4 | 131.2 | 131.8 | 136.5 | 131.8 | 131.2 | 165.8 | 30.0 |
| **4b** | 131.3 | 128.2 | 128.3 | 136.0 | 136.7 | 128.0 | 111.6 | 161.6 | 114.6 | 139.2 | 123.6 | 134.5 | 166.1 | 30.3 |
| **5b.HCl** | 144.9 | 135.5 | 128.4 | 131.4 | 131.9 | 126.9 | 135.4 | 157.0 | 112.8 | 133.2 | 121.9 | 126.1 | - | - |
| **14** | 139.2 | 130.5 | 127.7 | 134.4 | 135.7 | 129.0 | 136.5 | 136.1 | 130.3 | 134.3 | 134.2 | 125.3 | 166.4 | 29.4 |
| **15** | 136.4 | 135.9 | 127.1 | 133.7 | 134.1 | 127.9 | 136.4 | 135.9 | 127.1 | 133.7 | 134.1 | 127.9 | 163.9 | 27.3 |

a Signals of X and Y: **2b** 58.2 (2’-OMe); **2c** 19.6 (2’-Me); **2j** 57.0 (4’-OMe); **2k** 21.0 (4’-Me); **2n** 52.7 (4’-CO2Me); 164.7 (4’-CO2Me); **2o** 27.9 (4’-CONHMe); 169.7 (4’-CONHMe); **2p** 27.9 (4’-COMe); 198.0 (4’-COMe); **2q** 166.6 (4’-CO2H); **3f** 55.5 (2’-CO2Me) 168.5 (2’-CO2Me); **3g** 27.0 (2’-CONHMe); 166.5 (2’-CONHMe); **3h** 26.8 (2’-COMe); 203.8 (2’-COMe); **4b** 58.2 (2’-OMe); **5b.HCl** 26.9 (2-CONHMe) 166.9 (2-CONHMe) 56.9 (2’-OMe); **14** 168.0 (CO-)

**Table 21**. 13C-NMR data of the compound obtained by chlorination of sulfide **6** measured in DMSO-d6

| Comp. | C-1  C-2 | C-3  C-4 | C-5  C-6 | C-1’  C-2’ | C-3’  C-4’ | C-4a’  C-8a’ | C-5’  C-6’ | C-7’  C-8’ | NMe  OMe | CO (lactam)  CO (ester) |
| --- | --- | --- | --- | --- | --- | --- | --- | --- | --- | --- |
| **7** | 138.0  128.2 | 128.7  135.1 | 137.0  128.0 | 130.4  132.1 | 128.5  137.5 | 125.9  130.4 | 137.1  127.9 | 134.6  124.8 | 29.8  55.1 | 166.3  172.0 |

.

**Table 22**. 13C-NMR data of the compounds obtained by chlorination of sulfides **9a,f** measured in DMSO-d6

| Comp. | C-1  C-2 | C-3  C-4 | C-4a  C-8a | C-5  C-6 | C-7  C-8 | C-1’  C-2’ | C-3’  C-4’ | C-5’  C-6’ | NMe  OMe | CO (lactam)  CO (ester) |
| --- | --- | --- | --- | --- | --- | --- | --- | --- | --- | --- |
| **10a** | 133.8  133.6 | 129.4  136.4 | 117.0  127.3 | 137.1  128.3 | 132.9  120.4 | 134.5  128.7 | 132.0  135.8 | 132.0  128.7 | 38.2  - | 162.0  - |
| **11f** | 133.8  132.1 | 128.3  136.1 | 119.1  126.5 | 137.1  129.2 | 133.5  120.1 | 136.0  130.3 | 133.2  135.4 | 136.7  127.6 | 38.5  55.0 | 162.8  166.7 |

**Table 23**. 1H-NMR data of the compounds obtained by chlorination of sulfides **1a** **-q** measured in MeOD.

| Comp. | H-3  *d*a | H-4  *t*a | H-5  *t*a | H-6  *d*a | H-2’  *d*a | H-3’  *d*a,b or *t*a,b | H-4’  *t*a | H-5’  *t*a | H-6’  *d*a | NMe  *s* | X or Y |
| --- | --- | --- | --- | --- | --- | --- | --- | --- | --- | --- | --- |
| **3a** | 8.32 | 8.15 | 8.11 | 8.50 | 7.82 | 7.73 | 7.89 | 7.73 | 7.82 | 3.40 | - |
| **3b** | 8.31 | 8.14 | 8.10 | 8.35 | - | 7.41 | 7.90 | 7.27 | 7.55 | 3.41 | 3.90 *s* (2’-OMe) |
| **3c** | 8.31 | 8.22 | 8.15 | 8.51 | - | 7.58 | 7.82 | 7.40 | 7.04 | 3.44 | 3.22 *s* (2’-Me) |
| **3d** | 8.35 | 8.21 | 8.17 | 8.54 | - | 7.90 | 7.85 | 7.57 | 7.12 | 3.49 | - |
| **3e** | 8.34 | 8.05 | 8.01 | 8.31 | - | 8.61 | 8.07 | 8.10 | 7.80 | 3.55 | - |
| **3f** | 8.27 | 8.00 | 7.94 | 8.33 | - | 8.37 | 7.92 | 7.95 | 7.68 | 3.52 | 4.28 *s* (2’-CO2Me) |
| **3g** | 8.28 | 8.03 | 7.99 | 8.31 | - | 8.41 | 7.94 | 7.99 | 7.72 | 3.53 | 3.41 *s* (2’-CONHMe)c |
| **3h** | 8.25 | 8.04 | 8.00 | 8.51 | - | 8.33 | 7.99 | 7.73 | 7.69 | 3.48 | 3.01 *s* (2’-COMe) |
| **3j** | 8.33 | 8.14 | 8.11 | 8.28 | 7.77 | 7.26 | - | 7.26 | 7.77 | 3.35 | 3.95 *s* (4’-OMe) |
| **3k** | 8.33 | 8.14 | 8.11 | 8.32 | 7.75 | 7.67 | - | 7.67 | 7.75 | 3.35 | 2.57 *s* (4’-Me) |
| **3l** | 8.34 | 8.14 | 8.11 | 8.37 | 7.82 | 7.74 | - | 7.74 | 7.82 | 3.38 | - |
| **3m** | 8.36 | 8.14 | 8.11 | 8.43 | 8.08 | 8.47 | - | 8.47 | 8.08 | 3.42 | - |
| **3n** | 8.38 | 8.14 | 8.11 | 8.35 | 8.27 | 7.92 | - | 7.92 | 8.27 | 3.40 | 3.95 *s* (4’-CO2Me) |
| **3o** | 8.35 | 8.14 | 8.11 | 8.36 | 8.29 | 7.91 | - | 7.91 | 8.29 | 3.40 | 3.20 *s* (4’-CONHMe)c |
| **3p** | 8.36 | 8.15 | 8.12 | 8.33 | 8.18 | 7.93 | - | 7.93 | 8.18 | 3.45 | 2.55 *s* (4’-COMe) |
| **3q** | 8.36 | 8.14 | 8.11 | 8.35 | 8.26 | 7.92 | - | 7.92 | 8.26 | 3.43 | c |
| **4a** | 8.36 | 8.14 | 8.10 | 8.26 | 7.81 | 7.74 | 7.90 | 7.74 | 7.81 | 3.38 | - |
| **4b** | 8.36 | 8.14 | 8.11 | 8.24 | - | 7.38 | 7.91 | 7.30 | 7.54 | 3.40 | 3.93 *s* (2’-OMe) |
| **5b.HCl** | 7.73 | 7.60 | 7.74 | 7.73 | - | 7.31 | 7.49 | 7.24 | 7.11 | d | 3.87 *s* (2’-OMe) |
| **14** | 8.15 | 7.88 | 7.81 | 8.38 | - | 8.19 | 7.80 | 7.75 | 7.48 | 3.40 | - |
| **15** | 8.13 | 7.80 | 7.73 | 7.57 | - | 8.13 | 7.80 | 7.73 | 7.57 | 3.14 | 3.14 *s* (2’-CONMe) |

a J = 8.0 ± 0.6 Hz. b *d* for **3b-h**,**j-q**, , **4b, 5b.HCl**, **14** and **15**, *t* for **2a** and **4a**. c Due to fast exchange the NH signal of 2’- and 4’-CONHMe groups and the OH signal of the 4’-CO2H group are undetectable. e NHMe 2.85 *s* .

**Table 24**. 13C-NMR data of the compound obtained by chlorination of sulfide **6** measured in MeOD.

| Comp. | H-3  *d*a | H-4  *t*a | H-5  *t*a | H-6  *d*a | H-2’  *d*a | H-3’  *t*a | H-4’  *d*a | H-5’  *d*a | H-6’  *t*a | H-7’  *d*a | NMe  *s* | CO2Me  *s* |
| --- | --- | --- | --- | --- | --- | --- | --- | --- | --- | --- | --- | --- |
| **7** | 8.40 | 8.12 | 8.07 | 8.72 | 7.72 | 7.78 | 8.45 | 8.49 | 7.92 | 8.78 | 3.10 | 4.24 |

a J = 7.7 ± 0.1 Hz.

**Table 25**. 13C-NMR data of the compounds obtained by chlorination of sulfides **9a,f** measured in MeOD.

| Comp. | H-2  *d*a | H-3  *t*a | H-4  *d*a | H-5  *d*a | H-6  *t*a | H-7  *d*a | H-2’  *d*a | H-3’  *d*a,b or *t*a,b | H-4’  *t*a | H-5’  *t*a | H-6’  *d*a | NMe  *s* | CO2Me  *s* |
| --- | --- | --- | --- | --- | --- | --- | --- | --- | --- | --- | --- | --- | --- |
| **11a** | 8.67 | 7.99 | 8.60 c | 8.59c | 8.02 | 8.78 | 7.67 | 7.62 | 7.76 | 7.62 | 7.67 | 3.70 | - |
| **11f** | 8.95 | 7.87 | 8.45 | 8.48 | 7.96 | 8.81 | - | 8.28 | 7.81d | 7.81d | 7.70 | 3.67 | 4.18 |

a J = 7.4 ± 0.2 Hz. b *d* for **11f** and *t* for **11a**. c Partly overlapping signals. d Overlapping signals (2H): M part of an AMM’X spin system.

**Table 26. 13C-NMR data of the compounds obtained by chlorination of sulfides 1a -q measured in MeOD.a**

| Comp. | C-1 | C-2 | C-3 | C-4 | C-5 | C-6 | C-1’ | C-2’ | C-3’ | C-4’ | C-5’ | C-6’ | CO lactam | NMe |
| --- | --- | --- | --- | --- | --- | --- | --- | --- | --- | --- | --- | --- | --- | --- |
| **3a** | 133.9 | 128.6 | 129.0 | 136.8 | 136.5 | 128.4 | 128.2 | 132.8 | 133.2 | 138.0 | 133.2 | 132.8 | 165.9 | 29.2 |
| **3b** | 131.6 | 128.8 | 127.7 | 135.0 | 136.2 | 127.3 | 113.7 | 160.9 | 114.4 | 139.6 | 123.1 | 132.5 | 165.4 | 28.7 |
| **3c** | 131.2 | 128.4 | 129.5 | 136.8 | 137.8 | 128.5 | 130.3 | 140.6 | 132.1 | 137.4 | 129.3 | 131.1 | 165.9 | 29.0 |
| **3d** | 137.9 | 129.6 | 129.5 | 136.7 | 137.9 | 129.2 | 132.1 | 138.0 | 133.4 | 138.6 | 131.7 | 130.6 | 165.8 | 30.4 |
| **3e** | 136.2 | 126.6 | 129.7 | 135.5 | 137.2 | 126.4 | 128.1 | 148.0 | 127.9 | 136.1 | 138.1 | 126.5 | 166.5 | 30.0 |
| **3f** | 136.6 | 126.2 | 128.5 | 136.5 | 134.8 | 126.5 | 133.4 | 130.5 | 132.4 | 136.4 | 134.6 | 124.7 | 166.4 | 29.5 |
| **3g** | 136.2 | 127.7 | 128.2 | 137.9 | 135.4 | 127.2 | 136.0 | 132.3 | 133.0 | 137.0 | 135.7 | 124.1 | 166.4 | 29.8 |
| **3h** | 137.7 | 127.9 | 127.8 | 137.0 | 135.8 | 127.7 | 137.9 | 133.1 | 132.9 | 136.8 | 135.2 | 125.9 | 167.4 | 30.2 |
| **3j** | 133.7 | 127.7 | 127.9 | 136.6 | 135.2 | 127.3 | 134.3 | 134.1 | 117.3 | 167.5 | 117.3 | 134.1 | 165.3 | 28.2 |
| **3k** | 133.9 | 127.6 | 128.1 | 136.7 | 136.3 | 128.8 | 129.0 | 130.1 | 125.8 | 149.2 | 125.8 | 130.1 | 165.7 | 29.2 |
| **3l** | 134.1 | 128.4 | 129.2 | 137.7 | 136.4 | 130.0 | 128.8 | 133.5 | 132.8 | 144.4 | 132.8 | 133.5 | 165.8 | 29.4 |
| **3m** | 136.0 | 126.9 | 128.4 | 136.8 | 135.5 | 127.8 | 136.5 | 131.9 | 126.5 | 151.7 | 126.5 | 131.9 | 164.9 | 28.6 |
| **3n** | 136.4 | 127.9 | 126.7 | 134.5 | 133.7 | 126.2 | 137.2 | 130.6 | 129.3 | 134.1 | 129.3 | 130.6 | 164.9 | 27.0 |
| **3o** | 135.8 | 127.6 | 126.7 | 134.9 | 134.1 | 127.5 | 138.4 | 131.6 | 128.8 | 135.5 | 128.8 | 131.6 | 164.6 | 27.4 |
| **3p** | 134.8 | 128.2 | 127.0 | 135.0 | 134.5 | 128.6 | 140.4 | 132.2 | 129.6 | 131.2 | 129.6 | 132.2 | 165.1 | 28.1 |
| **3q** | 135.3 | 128.2 | 127.2 | 136.2 | 135.5 | 129.0 | 138.3 | 132.8 | 129.5 | 132.1 | 129.5 | 132.8 | 165.2 | 27.9 |
| **4a** | 134.2 | 128.7 | 129.3 | 137.6 | 136.2 | 129.1 | 129.4 | 131.8 | 132.6 | 137.8 | 132.6 | 131.8 | 165.8 | 29.3 |
| **4b** | 132.2 | 128.5 | 128.7 | 136.4 | 136.0 | 127.3 | 112.9 | 161.6 | 113.7 | 140.1 | 122.8 | 132.8 | 166.2 | 28.7 |
| **5b.HCl** | 144.5 | 136.3 | 128.7 | 132.1 | 132.5 | 126.2 | 135.9 | 159.3 | 113.7 | 134.2 | 121.7 | 127.7 | - | - |
| **14** | 138.3 | 127.5 | 127.7 | 134.2 | 135.3 | 128.2 | 135.2 | 129.3 | 130.6 | 133.9 | 134.0 | 126.4 | 166.2 | 27.0 |
| **15** | 135.9 | 136.1 | 127.9 | 134.4 | 134.7 | 128.1 | 135.9 | 136.1 | 127.9 | 134.4 | 134.7 | 128.1 | 166.2 | 27.0 |

a Signals of X and Y: **3b** 56.8 (2’-OMe);  **3c** 20.0 (2’-Me); **3f** 54.6 (2’-CO2Me) 169.1 (2’-CO2Me); **3g** 27.2 (2’-CONHMe); 166.8 (2’-CONHMe); **3h** 25.7 (2’-COMe); 204.6 (2’-COMe); **3j** 57.4 (4’-OMe); **3k** 21.5 (4’-Me); **3n** 51.9 (4’-CO2Me); 171.3 (4’-CO2Me); **3o** 27.6 (4’-CONHMe); 171.9 (4’-CONHMe); **3p** 28.4 (4’-COMe); 199.7 (4’-COMe); **3q** 167.6 (4’-CO2H); **4b** 58.8 (2’-OMe); **5b.HCl** 27.7 (2-CONHMe) 168.0 (2-CONHMe) 56.5 (2’-OMe); **14** 170.0 (CO-)

**Table 27**. 13C-NMR data of the compound obtained by chlorination of sulfide **6** measured in MeOD.

| Comp. | C-1  C-2 | C-3  C-4 | C-5  C-6 | C-1’  C-2’ | C-3’  C-4’ | C-4a’  C-8a’ | C-5’  C-6’ | C-7’  C-8’ | NMe  OMe | CO (lactam)  CO (ester) |
| --- | --- | --- | --- | --- | --- | --- | --- | --- | --- | --- |
| **7** | 137.5  128.9 | 129.3  137.4 | 135.8  128.9 | 137.0  132.1 | 128.7  138.2 | 124.5  131.7 | 137.8  128.4 | 136.0  125.8 | 28.7  55.0 | 166.4  173.1 |

.

**Table 28**. 13C-NMR data of the compounds obtained by chlorination of sulfides **9a,f** measured in MeOD.

| Comp. | C-1  C-2 | C-3  C-4 | C-4a  C-8a | C-5  C-6 | C-7  C-8 | C-1’  C-2’ | C-3’  C-4’ | C-5’  C-6’ | NMe  OMe | CO (lactam)  CO (ester) |
| --- | --- | --- | --- | --- | --- | --- | --- | --- | --- | --- |
| **11a** | 135.0  132.9 | 128.6  137.3 | 116.6  128.5 | 137.5  129.9 | 134.6  121.3 | 134.1  129.0 | 132.7  136.9 | 132.7  129.0 | 37.6  - | 162.5  - |
| **11f** | 134.9  133.2 | 128.3  137.0 | 118.9  127.5 | 137.7  129.5 | 134.3  120.9 | 136.0  130.6 | 135.8  136.8 | 136.7  127.4 | 38.2  54.9 | 163.9  167.8 |
